# Supplementary material for: A study on the synthesis of Ni50Co50 alloy nanostructures with tuned morphology through metal–organic chemical routes
Source: Royal Society of Chemistry journal article supplement (doi:10.1039/c4dt00390j), 2014-01-01
Supplement: c4dt00390j1.pdf [file c4dt00390j1.pdf]

## A Study on the Synthesis of Ni<sub>50</sub>Co<sub>50</sub> Alloy Nanostructures with Tuned Morphology through Metal-organic Chemical Routes

Stefanos Mourdikoudis<sup>\*,a</sup>, Vincent Collière, Pierre Fau, Myrtil L. Kahn<sup>\*</sup>

*Laboratoire de Chimie de Coordination, CNRS UPR 8241, 205 route de Narbonne, 31077 Toulouse, France*

\*e-mail: mourdik@uvigo.es (Tel: +34986818617), myrtil.kahn@lcc-toulouse.fr

<sup>a</sup>: Present address: Departamento de Química Física, Universidade de Vigo, 36310 Vigo, Spain

### Electronic Supplementary Information (ESI)

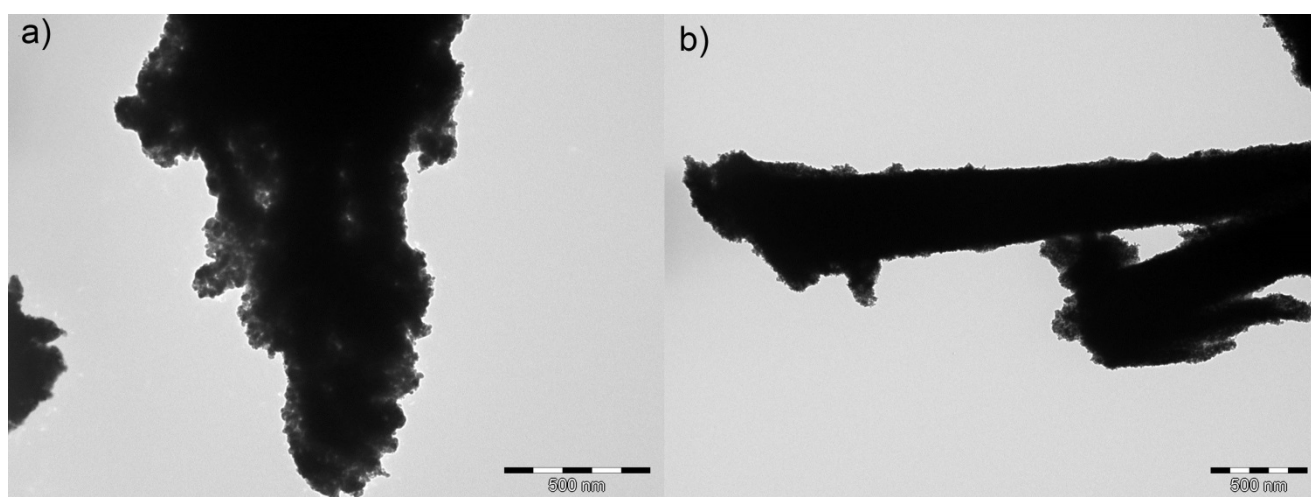

**Fig. S-1** TEM images for samples S1 (a) and S2 (b)

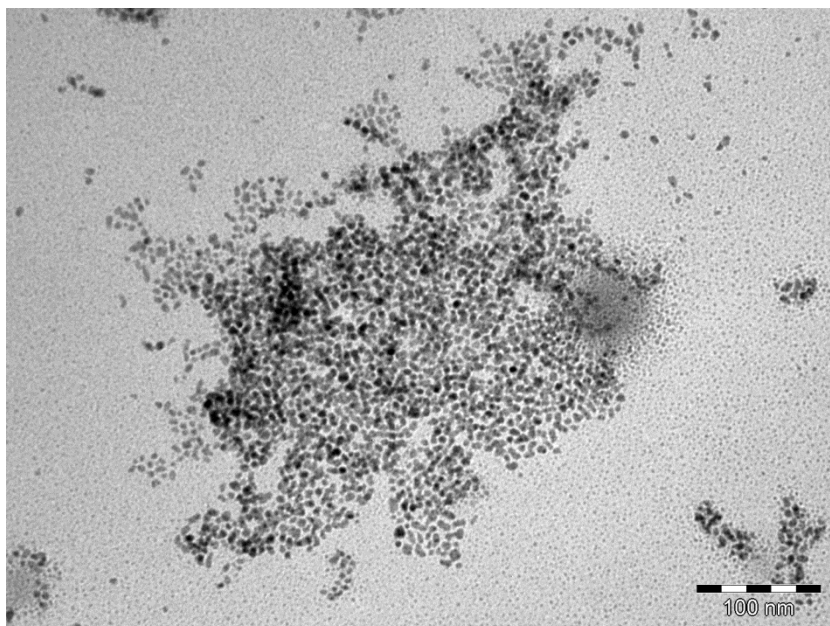

**Fig. S-2** TEM image for the sample S4

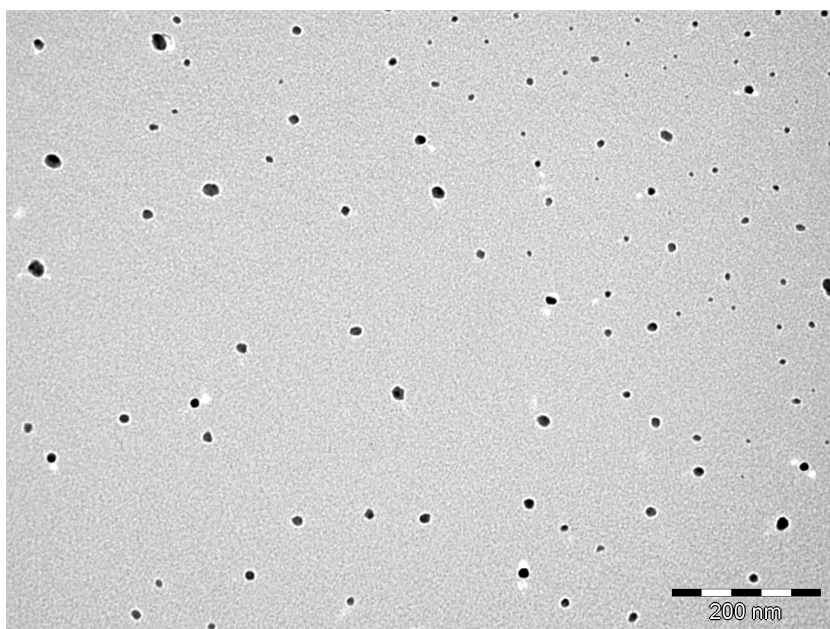

**Fig. S-3** TEM image for sample S5

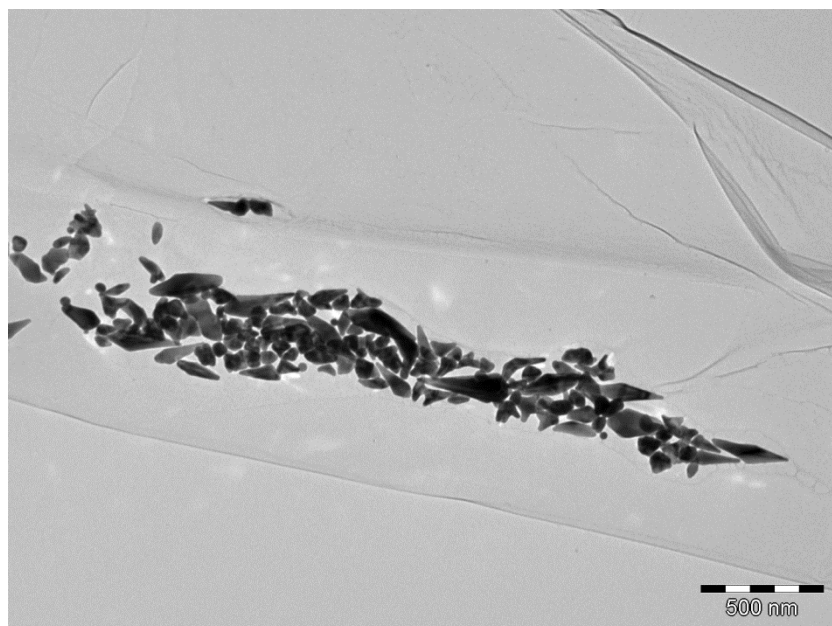

**Fig. S-4** TEM image for sample S6

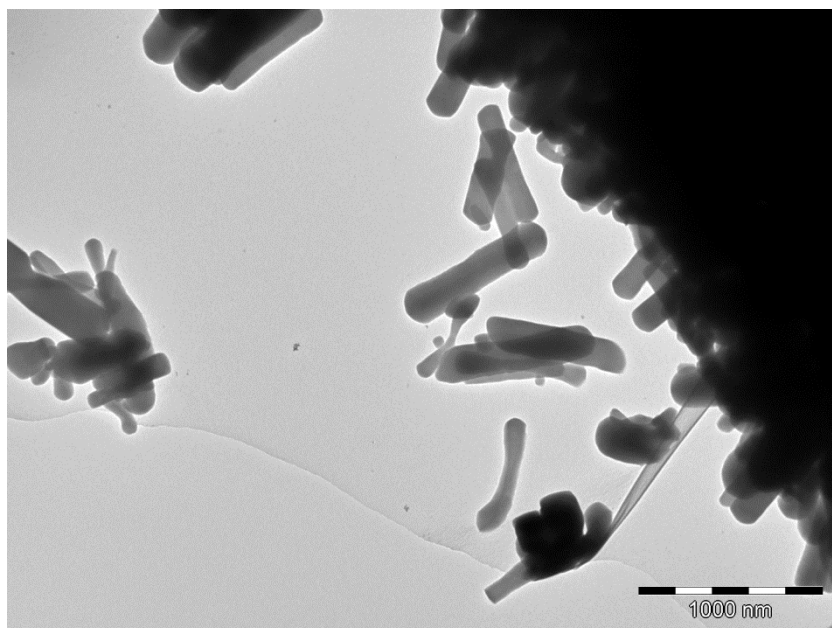

**Fig. S-5** TEM image for sample S7

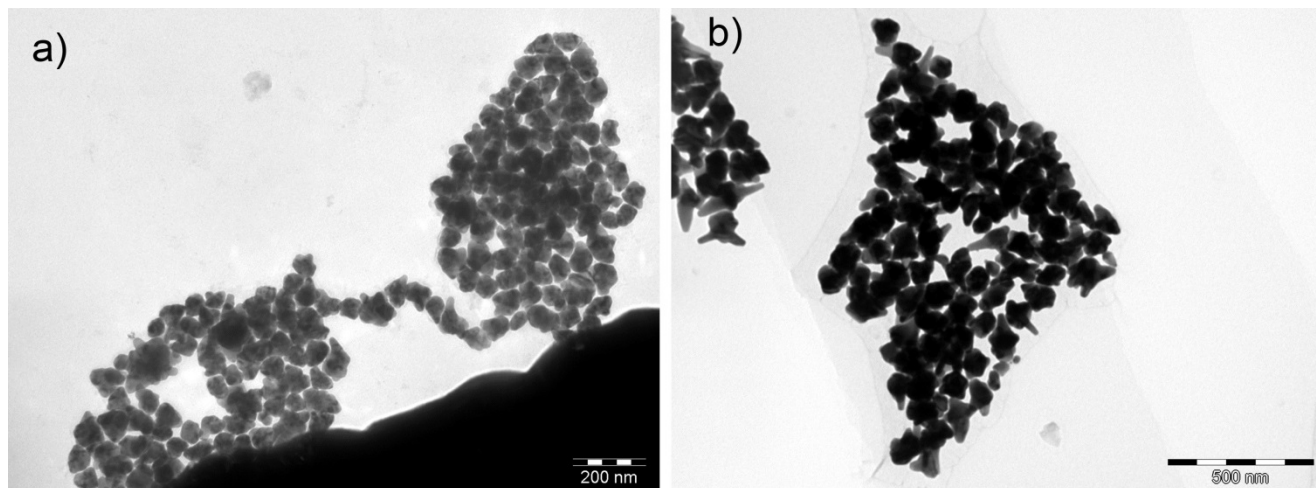

**Fig. S-6** TEM images for samples S11 (image a) and S10 (image b)

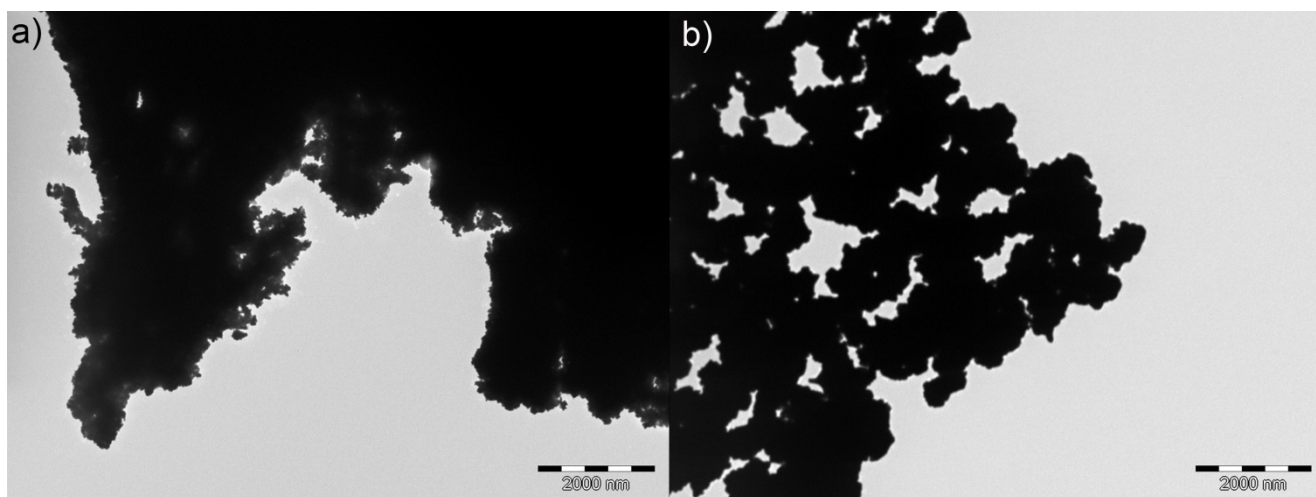

**Fig. S-7** TEM images for samples S12 (a) and S13 (b)

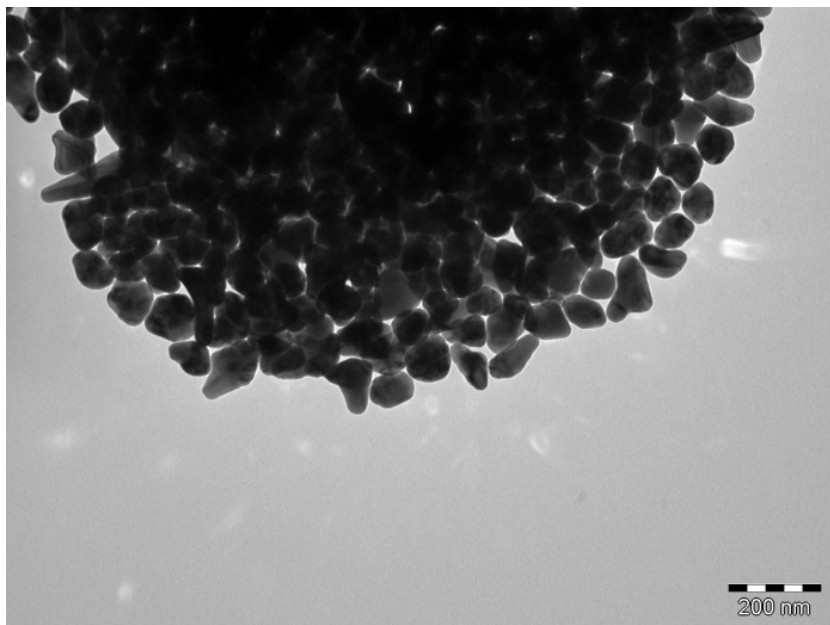

**Fig. S-8** TEM image for sample S15

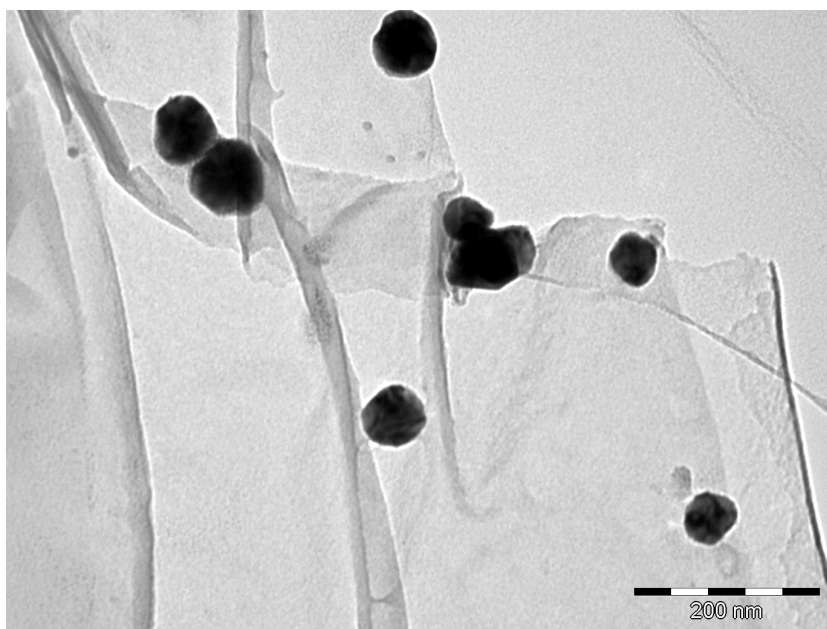

**Fig. S-9** TEM image for sample S17

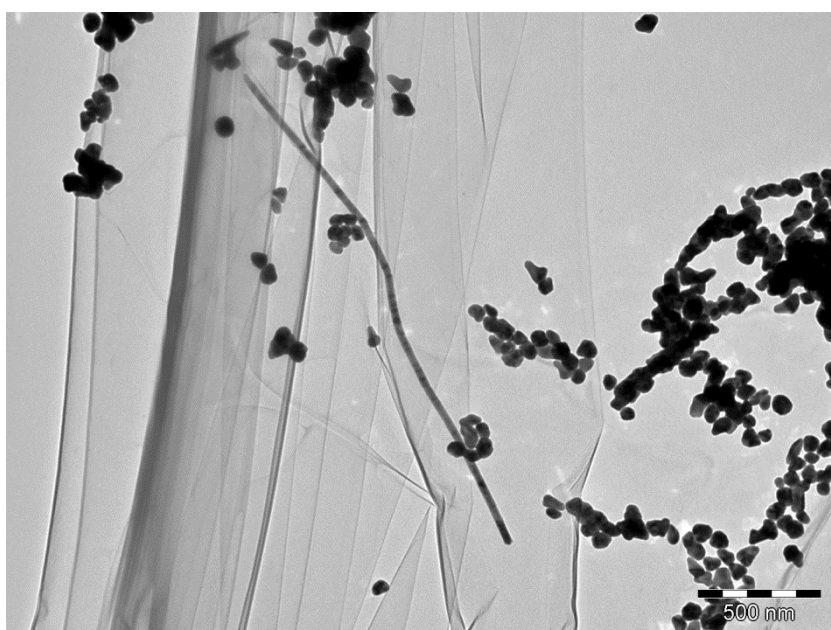

**Fig. S-10** TEM images for sample S18

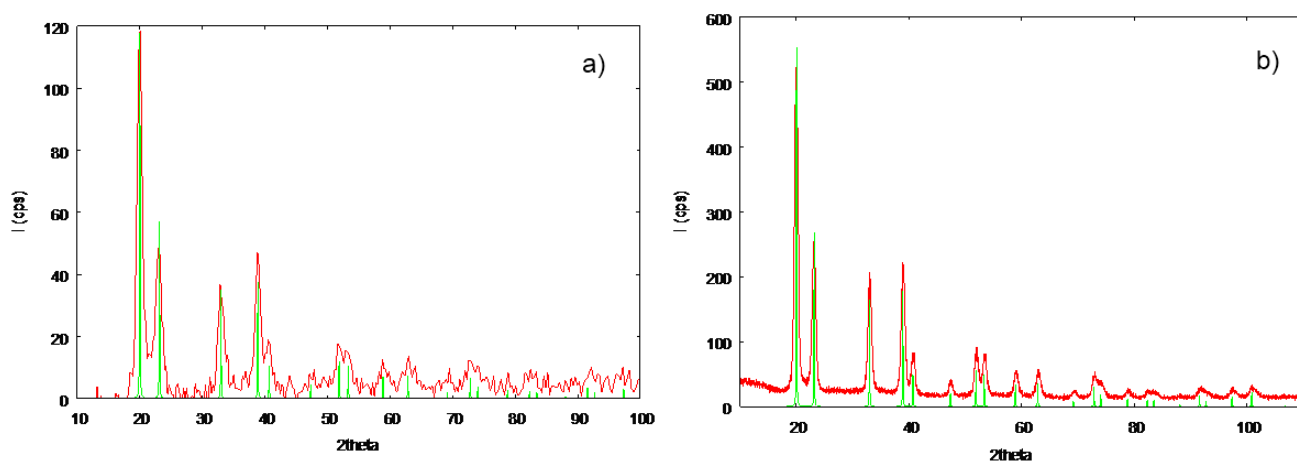

**Fig. S-11** WAXS measurement for samples S19 (a) and S18 (b). The red curves are the sample spectra and the green lines denote the ‘bulk’ reference peaks of NiCo.

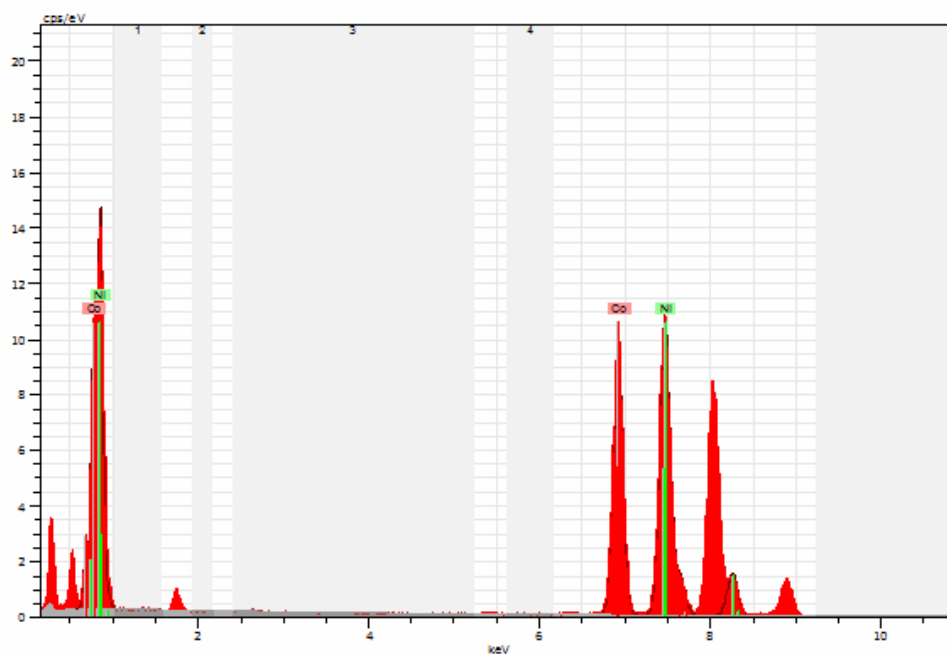

| Element | Series | norm. C [wt.%] | Atom. C [at.%] | Error |
|---------|--------|----------------|----------------|-------|
|---------|--------|----------------|----------------|-------|

|        |          |       |       |     |
|--------|----------|-------|-------|-----|
| cobalt | K-series | 46.83 | 46.73 | 1.0 |
| nickel | K-series | 53.17 | 53.27 | 1.1 |

-----  
Total: 100.00 100.00

**Fig. S-12** HRTEM/STEM-EDS analysis for sample S10.

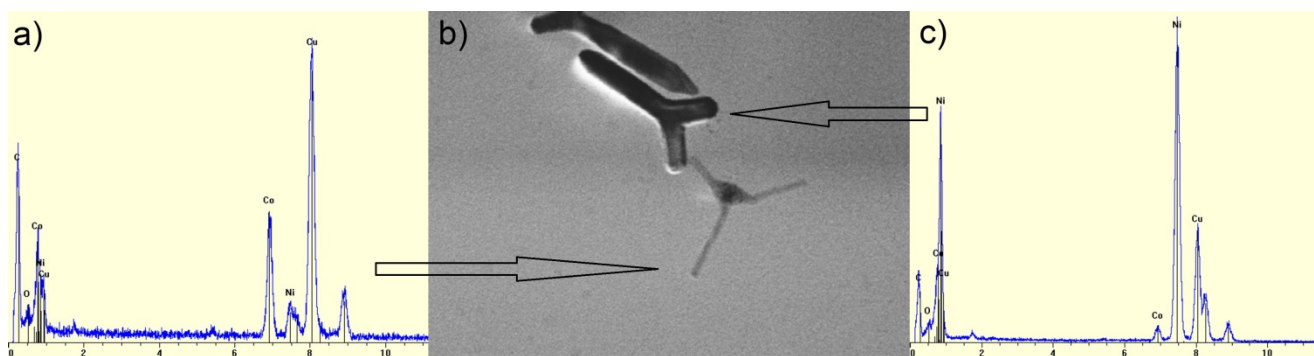

**Fig. S-13** HRTEM image for sample S20 (b). Figures a) and c) are EDS spectra which correspond to the 'thin' tripod and larger anisotropic structures respectively.

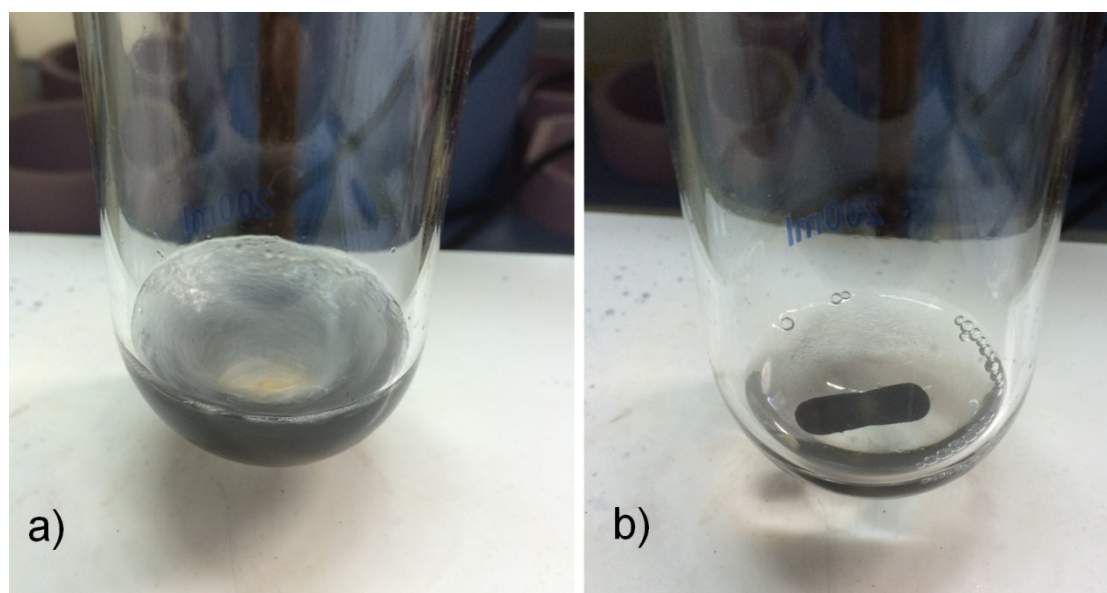

**Fig. S-14** Stirring conditions, applied during synthesis provide a grey-black color, indicating a 'colloidal' character for the nanoparticle solution (a); As soon as the reaction is finished, stirring is stopped also and the magnetic (metallic) nanomaterial is collected onto the stirring magnet, leaving excess surfactants diluted into the transparent solution of the supernatant liquid (b). Afterwards, removal of the supernatant with a canula and further washing cycles with pentane and THF facilitate the isolation of a product with high metallic content.



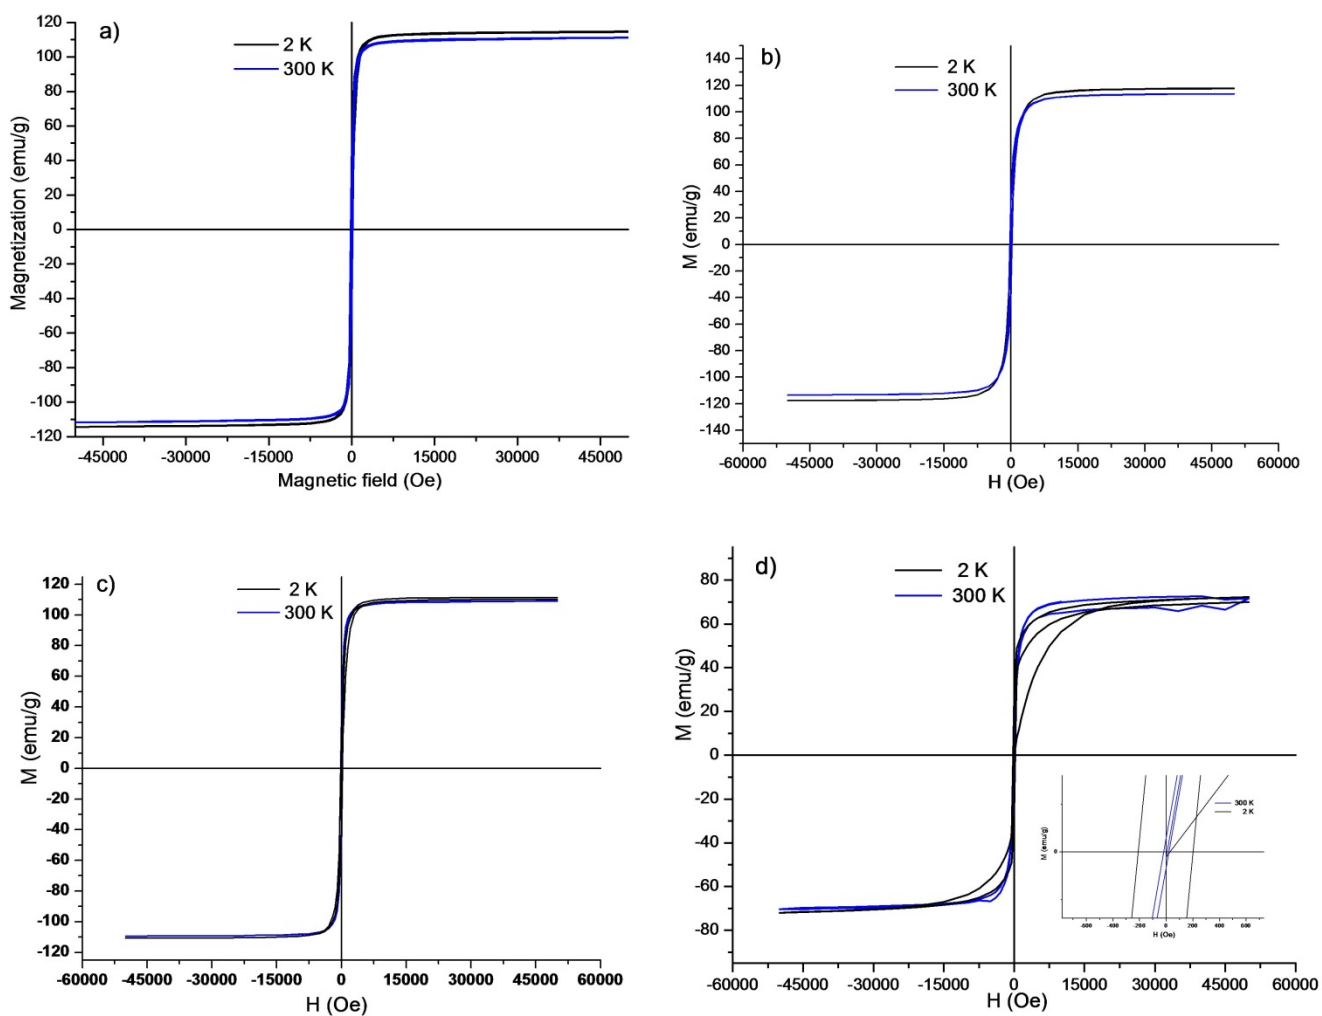

**Fig. S-15** M-H plots for samples S19, S18, S15 and S3, @ 2K and 300 K by SQUID magnetometer [(a), (b), (c) and (d) respectively].

**Estimation of the population of surface atoms of nanoparticles covered by stabilizer**

If 'd' is the diameter of an atom, and 'R' is the radius of the nanoparticle, then for a particle of a size of 10 nm and spherical shape, we have  $R = 5$ . The surface atoms form a spherical shell in the outer part of the nanoparticle with a thickness 'd'. The particle's total radius is R and its inner radius is (R-d). Thus the volume of the shell is :

$$V_{\text{shell}} = (4/3)\pi R^3 - (4/3)\pi(R-d)^3 = (4/3)\pi[R^3 - (R-d)^3]$$

The whole volume of the sphere (nanoparticle) is:

$$V_{\text{nanoparticle}} = (4/3)\pi R^3$$

To find the percentage of surface atoms, it's enough to find the ratio of the shell's volume to the nanoparticle's total volume:

$$V_{\text{shell}} / V_{\text{nanoparticle}} = (4/3)\pi(R^3 - (R-d)^3) / [(4/3)\pi R^3] = [R^3 - (R-d)^3] / R^3$$

For a particle of a size of 10 nm,  $R = 5$ . As the cell parameters of the Ni<sub>50</sub>Co<sub>50</sub> fcc alloy are similar to those of the Ni fcc lattice, we may assume that  $d \sim 0.248$  nm.

That gives a result of a ratio  $\sim 14\%$  of surface atoms for the case of 10 nm NiCo nanoparticles.

Then, using an average organic (surfactant) mass percentage of  $100 - 92 = 8\%$  (after washing) and also taking into account the molecular weight of NiCo (118 g) and an average molecular weight of the surfactants ( $\sim 275$  g), we calculate that approximately every 4 equivalents of NiCo surface atoms, there is 1 eq. of surfactants. This value may indicate a low coverage by surfactants, but we should also consider that such alkyl chain surfactants have long molecules, that extend to a length of  $\sim 2$  nm. Similarly, for a particle of  $\sim 50$  nm size, we may find that the surfactant coverage will be quite higher, as in that case the percentage of surface atoms would be limited at around  $\sim 6,5\%$ . That is, because, for an average surfactant mass percentage of 8% compared to the total sample mass, the surface atoms of the NP will have a lower population ratio at the samples of  $\sim 50$  nm, compared to the  $\sim 10$  nm-sized nanoparticles.
